# Supplementary material for: Masters of the Manipulator? A Comparative Genomics Study of Niveomyces gen. nov. and Two New Species of Mycoparasites Associated with Ophiocordyceps Camponoti-Floridani
Source: Research Square preprint supplement (doi:10.21203/rs.3.rs-449898/v1), 2021-04-28
Supplement: Supplementary file 1 [file 733580da8f81dcd8dd0d2163.xlsx]

## Sheet: Sheet1
ProteinID	MEROPS	Description
Polycep1|00061	MER0003544	ubiquinol-cytochrome c reductase core protein II
Polycep1|00097	MER0182135	PCADAM-type peptidase
Polycep1|00123	MER0011829	ornithine acetyltransferase precursor
Polycep1|00164	MER0032443	leucine aminopeptidase-1
Polycep1|00229	MER0044357	homoserine acetyltransferase
Polycep1|00390	MER0000440	tripeptidyl-peptidase B
Polycep1|00391	MER0026262	Pab87 peptidase
Polycep1|00628	MER0026262	Pab87 peptidase
Polycep1|00704	MER0006046	At5g23140-type peptidase
Polycep1|00839	MER0013494	Uch2 peptidase
Polycep1|00884	MER0018170	apsC g.p. N400
Polycep1|00892	MER0001288	aminopeptidase Y
Polycep1|00980	MER0023234	deterin
Polycep1|00980	MER0023234	deterin
Polycep1|00988	MER0037714	guanine deaminase
Polycep1|00999	MER0002605	m-AAA peptidase
Polycep1|01017	MER0001911	hypothetical 47 kDa protein
Polycep1|01067	MER0005692	20S proteasome component beta 6
Polycep1|01093	MER1054487	ferredoxin-dependent glutamate synthase 1
Polycep1|01174	MER0000553	proteasome subunit alpha 3
Polycep1|01213	MER0090759	PepAc peptidase
Polycep1|01232	MER0002474	uch1
Polycep1|01238	MER0001604	krp1 g.p.
Polycep1|01246	MER0000344	oryzin
Polycep1|01286	MER0000597	mitochondrial inner membrane peptidase 1
Polycep1|01291	MER0003908	carboxypeptidase MeCPA
Polycep1|01380	MER0015601	At1g65650
Polycep1|01383	MER0039482	metacaspase Yca1
Polycep1|01392	MER0039482	metacaspase Yca1
Polycep1|01412	MER0000356	cerevisin
Polycep1|01416	MER0000344	oryzin
Polycep1|01421	MER0472834	kyphoscoliosis peptidase
Polycep1|01427	MER0061068	PyrC protein
Polycep1|01449	MER0001878	putative ubiquitin carboxyl-terminal hydrolase ybl067c
Polycep1|01484	MER0185433	DDB_G0275415
Polycep1|01505	MER0093133	acid prolyl endopeptidase
Polycep1|01564	MER0001733	YFR006W g.p.
Polycep1|01610	MER0001218	Ste23 peptidase
Polycep1|01611	MER0001879	putative ubiquitin carboxyl-terminal hydrolase ybr058c
Polycep1|01611	MER0001879	putative ubiquitin carboxyl-terminal hydrolase ybr058c
Polycep1|01644	MER0060647	dihydro-orotase (N-terminal unit)
Polycep1|01705	MER0005900	Pro-Hyp dipeptidase
Polycep1|01759	MER0001944	carboxypeptidase O
Polycep1|01777	MER0033184	hypothetical protein like 5730457F11RIK
Polycep1|01797	MER0031618	monoglyceride lipase
Polycep1|01826	MER0000344	oryzin
Polycep1|01830	MER0000496	PIM1 peptidase
Polycep1|01907	MER0066916	imidazoleglycerol-phosphate synthase
Polycep1|01916	MER0001269	Gly-Xaa carboxypeptidase
Polycep1|01974	MER0400048	OTU2 peptidase
Polycep1|02016	MER0001399	penicillolysin
Polycep1|02025	MER0017177	cytosolic epoxide hydrolase
Polycep1|02105	MER0351045	neprosin
Polycep1|02147	MER0002197	i-AAA peptidase
Polycep1|02181	MER0079232	mitochondrial processing peptidase subunit alpha unit 2
Polycep1|02217	MER0026494	carnosine dipeptidase II
Polycep1|02222	MER0001400	fungalysin
Polycep1|02246	MER0033237	arylacetamide deacetylase
Polycep1|02303	MER0000263	dipeptidyl-peptidase 5
Polycep1|02336	MER0017177	cytosolic epoxide hydrolase
Polycep1|02375	MER0078639	grifolisin
Polycep1|02479	MER0015686	At5g07250
Polycep1|02514	MER0192051	HflK
Polycep1|02535	MER0000344	oryzin
Polycep1|02560	MER0001710	proteasome subunit beta 3
Polycep1|02645	MER0000928	endothiapepsin
Polycep1|02664	MER0215799	F14J16.17 protein
Polycep1|02691	MER0044619	SPBP8B7.29
Polycep1|02701	MER0000549	proteasome subunit alpha 1
Polycep1|02755	MER0015691	At5g19740-type peptidase
Polycep1|02758	MER0324208	At2g25190 g.p.
Polycep1|02791	MER0000344	oryzin
Polycep1|02852	MER0000557	proteasome subunit alpha 6
Polycep1|02865	MER0000338	cuticle-degrading peptidase of parasitic fungus
Polycep1|02962	MER0043126	esterase D
Polycep1|02963	MER0045886	GMP synthase
Polycep1|02979	MER0001156	mitochondrial intermediate peptidase
Polycep1|02984	MER0000338	cuticle-degrading peptidase of parasitic fungus
Polycep1|03061	MER0323972	DDB_0191673 protein
Polycep1|03075	MER0094876	oxamate amidohydrolase proenzyme
Polycep1|03080	MER0078639	grifolisin
Polycep1|03082	MER0078639	grifolisin
Polycep1|03105	MER0002477	glycosylphosphatidylinositol:protein transamidase
Polycep1|03203	MER0000436	iminopeptidase I and similar
Polycep1|03215	MER0042827	phosphoribosylformylglycinamidine synthase
Polycep1|03221	MER0167712	microcystinase MlrC
Polycep1|03242	MER0116559	YOD1 peptidase
Polycep1|03248	MER0001877	ubp8
Polycep1|03266	MER0000928	endothiapepsin
Polycep1|03316	MER0030137	COP9 signalosome subunit 6
Polycep1|03329	MER0472834	kyphoscoliosis peptidase
Polycep1|03340	MER0033274	hormone-sensitive lipase
Polycep1|03370	MER0013463	aminopeptidase P3
Polycep1|03424	MER0006204	esterase EstB
Polycep1|03431	MER0003297	Nma111 peptidase
Polycep1|03463	MER0002179	ubp5
Polycep1|03512	MER0215827	SPCC1442.07c g.p.
Polycep1|03514	MER0001010	Aap1' aminopeptidase
Polycep1|03538	MER0002281	leukotriene A4 hydrolase
Polycep1|03552	MER0014642	ubp9
Polycep1|03591	MER0027251	mSPP peptidase
Polycep1|03611	MER0026262	Pab87 peptidase
Polycep1|03613	MER0036083	At3g09690
Polycep1|03618	MER0014006	trichodermapepsin
Polycep1|03644	MER0001884	ubiquitin-specific peptidase 8
Polycep1|03700	MER0045094	TRP3 protein
Polycep1|03713	MER0000440	tripeptidyl-peptidase B
Polycep1|03716	MER0034665	SPAPB1A11.02 g.p.
Polycep1|03746	MER0059846	YheT protein
Polycep1|03750	MER0064621	ubiquitin-specific endopeptidase 39
Polycep1|03819	MER0004801	urease
Polycep1|03872	MER0015094	glutaminyl-peptide cyclotransferase-like non-peptidase homologue
Polycep1|03874	MER0210990	At5g53050 or MhpC protein
Polycep1|03875	MER0033244	C14orf29 protein
Polycep1|03885	MER0000338	cuticle-degrading peptidase of parasitic fungus
Polycep1|03894	MER0003669	yapsin-3
Polycep1|03900	MER0065588	imidazole glycerol phosphate synthase subunit HisH
Polycep1|03904	MER0026262	Pab87 peptidase
Polycep1|03948	MER0215828	wss1 g.p.
Polycep1|03969	MER0000441	tripeptidyl-peptidase C
Polycep1|03972	MER0029866	phosphatidylethanolamine-binding protein
Polycep1|03984	MER0003909	insulysin homologue
Polycep1|03985	MER0002635	Ste24 peptidase
Polycep1|03987	MER0015270	cym1 g.p.
Polycep1|04025	MER0000865	Ubp2 ubiquitin peptidase
Polycep1|04044	MER0093133	acid prolyl endopeptidase
Polycep1|04060	MER0044357	homoserine acetyltransferase
Polycep1|04096	MER0010982	separase (yeast-type)
Polycep1|04108	MER0037714	guanine deaminase
Polycep1|04113	MER0004504	dipeptidyl peptidase 4
Polycep1|04139	MER0000485	Lon-A peptidase
Polycep1|04185	MER0026471	Dug1 peptidase
Polycep1|04190	MER0026495	FACT complex subunit SPT16
Polycep1|04205	MER0005497	proliferation-association protein 1
Polycep1|04232	MER0005436	ubp3
Polycep1|04241	MER0004720	antigen Pen c 1-type peptidase
Polycep1|04313	MER0030134	26S proteasome non-ATPase regulatory subunit 7
Polycep1|04380	MER0020214	nup189
Polycep1|04463	MER0004372	proteasome subunit alpha 7
Polycep1|04486	MER0005900	Pro-Hyp dipeptidase
Polycep1|04526	MER0001399	penicillolysin
Polycep1|04571	MER0001516	proteasome subunit beta5c
Polycep1|04604	MER0000405	dipeptidyl aminopeptidase B (fungus)
Polycep1|04609	MER0000436	iminopeptidase I and similar
Polycep1|04675	MER0000836	ubiquitinyl hydrolase-L3
Polycep1|04689	MER0014693	SUSP4 peptidase
Polycep1|04697	MER0006006	kex1 g.p.
Polycep1|04751	MER0001367	prolyl aminopeptidase 2
Polycep1|04757	MER0122119	csn5 g.p.
Polycep1|04789	MER0000440	tripeptidyl-peptidase B
Polycep1|04895	MER0034727	carboxylesterase 6
Polycep1|04911	MER0060647	dihydro-orotase (N-terminal unit)
Polycep1|04925	MER0044357	homoserine acetyltransferase
Polycep1|04948	MER0034539	AsnB protein
Polycep1|04993	MER0000602	signalase 21 kDa component
Polycep1|05130	MER0002489	alkaline D-peptidase
Polycep1|05134	MER0004247	dipeptidyl-peptidase III
Polycep1|05135	MER0003110	oligopeptidase MepB
Polycep1|05256	MER0004996	SPCC1442.06 g.p.
Polycep1|05288	MER0000554	proteasome subunit alpha 4
Polycep1|05333	MER0000336	peptidase T
Polycep1|05433	MER0005078	subtilisin-like peptidase 3
Polycep1|05450	MER0047718	PoSl-type peptidase
Polycep1|05450	MER0047718	PoSl-type peptidase
Polycep1|05505	MER0032443	leucine aminopeptidase-1
Polycep1|05553	MER0030133	eukaryotic translation initiation factor 3 subunit F
Polycep1|05555	MER0015472	Pcp1 peptidase
Polycep1|05569	MER0030317	ubiquitin-specific peptidase 52
Polycep1|05571	MER0004247	dipeptidyl-peptidase III
Polycep1|05629	MER0000542	proteasome subunit beta2c
Polycep1|05678	MER0029056	otubain-1
Polycep1|05701	MER0047611	Mername-AA242 peptidase homologue
Polycep1|05705	MER0030081	putative v-snare binding protein
Polycep1|05793	MER0000344	oryzin
Polycep1|05912	MER0003374	aspartyl aminopeptidase
Polycep1|05933	MER0001342	methionyl aminopeptidase 1
Polycep1|05956	MER0080922	SA76 peptidase
Polycep1|05995	MER0011032	pyroglutamyl-peptidase I
Polycep1|06004	MER0016549	carboxypeptidase OcpB
Polycep1|06041	MER0002676	proteasome subunit beta 2
Polycep1|06043	MER0011024	ulp2 protein
Polycep1|06094	MER0011422	CG6154 g.p.
Polycep1|06107	MER0001629	gamma-glutamyltransferase 1
Polycep1|06170	MER0001728	methionyl aminopeptidase 2
Polycep1|06212	MER0015691	At5g19740-type peptidase
Polycep1|06226	MER0078983	CtsD peptidase
Polycep1|06246	MER0004893	DmpA aminopeptidase
Polycep1|06265	MER0004085	sfericase
Polycep1|06341	MER0004316	ubp6
Polycep1|06432	MER0022005	F37A4.5 protein
Polycep1|06453	MER0003798	yodQ g.p.
Polycep1|06480	MER0000344	oryzin
Polycep1|06484	MER0030146	STAMBP isopeptidase
Polycep1|06486	MER0122661	pksF
Polycep1|06516	MER0000432	epoxide hydrolase
Polycep1|06527	MER0064210	SENP8 peptidase (fungus-type)
Polycep1|06533	MER0000864	Ubp1 ubiquitin peptidase
Polycep1|06533	MER0000864	Ubp1 ubiquitin peptidase
Polycep1|06537	MER0001629	gamma-glutamyltransferase 1
Polycep1|06627	MER0001733	YFR006W g.p.
Polycep1|06635	MER0034745	2210023G05RIK protein
Polycep1|06752	MER0002694	ubpA
Polycep1|06775	MER1143079	paenidase
Polycep1|06833	MER0003541	cpy1 g.p.
Polycep1|06860	MER0208659	PLN02872 protein
Polycep1|06866	MER0011785	Mername-AA086 putative peptidase
Polycep1|06914	MER0000941	saccharopepsin
Polycep1|06919	MER0043475	gamma-glutamyl peptidase 1
Polycep1|06936	MER0005406	Rim13 peptidase
Polycep1|06942	MER0026545	Oma1 peptidase
Polycep1|06967	MER0001229	mitochondrial processing peptidase beta-subunit
Polycep1|06996	MER0000440	tripeptidyl-peptidase B
Polycep1|07010	MER0004231	Hip1 peptidase
Polycep1|07013	MER0000328	Prb1 peptidase
Polycep1|07045	MER0127117	ATP23 peptidase
Polycep1|07059	MER0200434	highly similar to acyl-protein thioesterase 1
Polycep1|07065	MER0012158	glutamine:fructose-6-phosphate amidotransferase
Polycep1|07066	MER0001711	proteasome subunit beta 4
Polycep1|07080	MER0208659	PLN02872 protein
Polycep1|07113	MER0016549	carboxypeptidase OcpB
Polycep1|07139	MER0001645	proteasome subunit beta1c
Polycep1|07167	MER1143079	paenidase
Polycep1|07195	MER0003105	FRA1 g.p.
Polycep1|07205	MER0011350	CG7415 g.p.
Polycep1|07226	MER0001010	Aap1' aminopeptidase
Polycep1|07228	MER0036069	At4g10050
Polycep1|07232	MER0078639	grifolisin
Polycep1|07243	MER0000440	tripeptidyl-peptidase B
Polycep1|07265	MER0000440	tripeptidyl-peptidase B
Polycep1|07284	MER0032370	GliJ g.p.
Polycep1|07292	MER0043475	gamma-glutamyl peptidase 1
Polycep1|07341	MER0013559	ATG4 peptidase
Polycep1|07346	MER0005767	dihydro-orotase
Polycep1|07354	MER0013421	carboxypeptidase A4
Polycep1|07371	MER0061068	PyrC protein
Polycep1|07395	MER0003110	oligopeptidase MepB
Polycep1|07395	MER0003110	oligopeptidase MepB
Polycep1|07402	MER0000328	Prb1 peptidase
Polycep1|07435	MER0004101	At2g16570
Polycep1|07438	MER0034959	F27c8.6 g.p.
Polycep1|07469	MER0004247	dipeptidyl-peptidase III
Polycep1|07557	MER0028284	colibactin peptidase
Polycep1|07560	MER0017177	cytosolic epoxide hydrolase
Polycep1|07567	MER0017177	cytosolic epoxide hydrolase
Polycep1|07573	MER0061068	PyrC protein
Polycep1|07583	MER0028284	colibactin peptidase
Polycep1|07597	MER0017242	hypothetical ORF Ynl320wp
Polycep1|07644	MER0016969	taspase-1
Polycep1|07654	MER0002010	carboxypeptidase Y
Polycep1|07671	MER0003541	cpy1 g.p.
Polycep1|07733	MER0004085	sfericase
Polycep1|07758	MER0001255	aminopeptidase I
Polycep1|07869	MER0003564	dipeptidyl-peptidase III
Polycep1|07870	MER0003541	cpy1 g.p.
Polycep1|07883	MER0091601	zpx peptidase
Polycep1|07893	MER0003110	oligopeptidase MepB
Polycep1|07905	MER0002010	carboxypeptidase Y
Polycep1|07916	MER0064573	secernin 2
Polycep1|07917	MER0064576	secernin 3
Polycep1|08004	MER0016549	carboxypeptidase OcpB
Polycep1|08026	MER0021886	Mername-AA168 protein
Polycep1|08213	MER0000412	carboxypeptidase OcpA
Polycep1|08303	MER0004598	At4g30910
Polycep1|08323	MER0017401	trilobed protease
Polycep1|08341	MER0198917	glutamate synthase (NADPH) large chain
Polycep1|08410	MER1054226	MINDY-1 protein

## Sheet: Sheet2
ProteinID	MEROPS	Description
Akanth1|00018	MER0014006	trichodermapepsin
Akanth1|00027	MER0005900	Pro-Hyp dipeptidase
Akanth1|00038	MER0005329	aorsin
Akanth1|00134	MER0472834	kyphoscoliosis peptidase
Akanth1|00147	MER0030137	COP9 signalosome subunit 6
Akanth1|00271	MER0000057	trypsin (mosquito type)
Akanth1|00284	MER0001728	methionyl aminopeptidase 2
Akanth1|00288	MER0001342	methionyl aminopeptidase 1 (eukaryote)
Akanth1|00313	MER0017622	SPAC823.09c g.p. ({Schizosaccharomyces pombe})
Akanth1|00325	MER0011800	At4g29210 ({Arabidopsis thaliana})
Akanth1|00326	MER0006124	C53D5.5 g.p. ({Caenorhabditis elegans})
Akanth1|00358	MER0078639	grifolisin
Akanth1|00388	MER0060647	dihydro-orotase (N-terminal unit) ({Homo sapiens}-type)
Akanth1|00389	MER0060647	dihydro-orotase (N-terminal unit) ({Homo sapiens}-type)
Akanth1|00396	MER0001399	penicillolysin
Akanth1|00423	MER0015691	At5g19740 ({Arabidopsis thaliana})-type peptidase
Akanth1|00448	MER0001400	fungalysin
Akanth1|00452	MER0026469	allantoate amidohydrolase
Akanth1|00453	MER0017177	cytosolic epoxide hydrolase
Akanth1|00488	MER0004247	dipeptidyl-peptidase III ({Saccharomyces}-type)
Akanth1|00569	MER0000338	cuticle-degrading peptidase of parasitic fungus
Akanth1|00632	MER0015601	At1g65650 ({Arabidopsis thaliana})
Akanth1|00635	MER0039482	metacaspase Yca1 ({Saccharomyces cerevisiae}-type)
Akanth1|00637	MER0114503	metacaspase Ac ({Acanthamoeba}-type)
Akanth1|00684	MER0001711	proteasome subunit beta 4
Akanth1|00685	MER0012158	glutamine:fructose-6-phosphate amidotransferase
Akanth1|00695	MER0011350	CG7415 g.p. ({Drosophila melanogaster})
Akanth1|00709	MER0017242	hypothetical ORF Ynl320wp ({Saccharomyces cerevisiae})
Akanth1|00752	MER0037714	guanine deaminase
Akanth1|00765	MER0066227	tryptophanyl aminopeptidase 7-DMATS-type peptidase
Akanth1|00770	MER0044619	SPBP8B7.29 ({Schizosaccharomyces pombe})
Akanth1|00810	MER0093133	acid prolyl endopeptidase ({Aspergillus} sp.)
Akanth1|00830	MER0003541	cpy1 g.p. ({Schizosaccharomyces pombe})
Akanth1|00834	MER0003110	oligopeptidase MepB
Akanth1|00859	MER0002197	i-AAA peptidase
Akanth1|01021	MER0011829	ornithine acetyltransferase precursor
Akanth1|01036	MER0000598	mitochondrial inner membrane peptidase 2
Akanth1|01063	MER0005704	CHY1 peptidase ({Metarhizium anisopliae})
Akanth1|01086	MER0000602	signalase (animal) 21 kDa component
Akanth1|01097	MER0014006	trichodermapepsin
Akanth1|01117	MER0065588	imidazole glycerol phosphate synthase subunit HisH
Akanth1|01131	MER0005900	Pro-Hyp dipeptidase
Akanth1|01156	MER0043475	gamma-glutamyl peptidase 1 ({Arabidopsis thaliana})
Akanth1|01160	MER0044357	homoserine acetyltransferase ({Saccharomyces cerevisiae})
Akanth1|01170	MER0017177	cytosolic epoxide hydrolase
Akanth1|01200	MER0026262	Pab87 peptidase
Akanth1|01206	MER0000432	epoxide hydrolase
Akanth1|01212	MER0080922	SA76 peptidase ({Trichoderma sp.})
Akanth1|01233	MER0001423	dipeptidyl-peptidase 4 (bacteria-type 2)
Akanth1|01269	MER0029657	Mername-AA293 peptidase
Akanth1|01358	MER0078639	grifolisin
Akanth1|01371	MER0017177	cytosolic epoxide hydrolase
Akanth1|01386	MER0004220	acyl-coenzyme A:6-aminopenicillanic acid acyl-transferase precursor
Akanth1|01400	MER0005329	aorsin
Akanth1|01418	MER0182135	PCADAM-type peptidase
Akanth1|01447	MER0039464	metacaspase Atmc7 g.p. ({Arabidopsis thaliana})
Akanth1|01523	MER0093593	sentrin-specific peptidase 15 ({Mus musculus})
Akanth1|01524	MER0002512	Mername-AA083 peptidase
Akanth1|01556	MER0001733	YFR006W g.p. ({Saccharomyces cerevisiae})
Akanth1|01575	MER0094876	oxamate amidohydrolase proenzyme ({Klebsiella pneumonia})
Akanth1|01611	MER0015691	At5g19740 ({Arabidopsis thaliana})-type peptidase
Akanth1|01648	MER0003110	oligopeptidase MepB
Akanth1|01650	MER0037236	2-hydroxy-6-oxo-6-phenylhexa-2,4-dienoate hydrolase ({Burkholderia}-type)
Akanth1|01651	MER0001320	scytalidoglutamic peptidase
Akanth1|01654	MER0038141	Hsp31 peptidase
Akanth1|01662	MER0000432	epoxide hydrolase
Akanth1|01671	MER0045886	GMP synthase
Akanth1|01683	MER0026471	Dug1 peptidase
Akanth1|01735	MER0001255	aminopeptidase I
Akanth1|01741	MER0078639	grifolisin
Akanth1|01758	MER0000864	Ubp1 ubiquitin peptidase
Akanth1|01794	MER0001367	prolyl aminopeptidase 2
Akanth1|01803	MER0043126	esterase D
Akanth1|01815	MER0000836	ubiquitinyl hydrolase-L3
Akanth1|01837	MER0006204	esterase EstB
Akanth1|01838	MER0000338	cuticle-degrading peptidase of parasitic fungus
Akanth1|01886	MER0020214	nup189 ({Schizosaccharomyces pombe})
Akanth1|01912	MER0078639	grifolisin
Akanth1|01914	MER0001288	aminopeptidase Y
Akanth1|01931	MER0033184	hypothetical protein like 5730457F11RIK
Akanth1|01980	MER0011806	At4g34740 ({Arabidopsis thaliana})
Akanth1|01984	MER0001645	proteasome subunit beta1c
Akanth1|01994	MER0044899	At1g74280 ({Arabidopsis thaliana})
Akanth1|01995	MER0014006	trichodermapepsin
Akanth1|02139	MER0022005	F37A4.5 protein ({Caenorhabditis elegans})
Akanth1|02211	MER0078983	CtsD peptidase ({Aspergillus}-type)
Akanth1|02221	MER0004996	SPCC1442.06 g.p. ({Schizosaccharomyces pombe})
Akanth1|02248	MER0030134	26S proteasome non-ATPase regulatory subunit 7
Akanth1|02259	MER0000932	candidapepsin SAP2
Akanth1|02294	MER0032370	GliJ g.p. ({Aspergillus fumigatus})
Akanth1|02319	MER0037291	pepsin A5 ({Homo sapiens})
Akanth1|02337	MER0032443	leucine aminopeptidase-1 ({Aspergillus fumigatus})
Akanth1|02399	MER0003037	podosporapepsin
Akanth1|02401	MER0000432	epoxide hydrolase
Akanth1|02404	MER0000457	aminopeptidase DmpB
Akanth1|02437	MER0047718	PoSl ({Pleurotus ostreatus})-type peptidase
Akanth1|02437	MER0047718	PoSl ({Pleurotus ostreatus})-type peptidase
Akanth1|02453	MER0005692	20S proteasome component beta 6
Akanth1|02480	MER0031617	hypothetical protein flj22408 (epoxide hydrolase)
Akanth1|02497	MER0021886	Mername-AA168 protein
Akanth1|02503	MER0045094	TRP3 protein
Akanth1|02642	MER0000440	tripeptidyl-peptidase B
Akanth1|02676	MER0044357	homoserine acetyltransferase ({Saccharomyces cerevisiae})
Akanth1|02680	MER0026262	Pab87 peptidase
Akanth1|02688	MER0015090	Mername-AA224 non-peptidase homologue
Akanth1|02728	MER0026469	allantoate amidohydrolase
Akanth1|02740	MER0061068	PyrC protein ({Escherichia coli})
Akanth1|02767	MER0001733	YFR006W g.p. ({Saccharomyces cerevisiae})
Akanth1|02768	MER0001733	YFR006W g.p. ({Saccharomyces cerevisiae})
Akanth1|02774	MER0045376	secernin 1
Akanth1|02777	MER0014065	similar to hypothetical protein FLJ22408
Akanth1|02841	MER0043475	gamma-glutamyl peptidase 1 ({Arabidopsis thaliana})
Akanth1|02849	MER0209266	lipase M
Akanth1|02861	MER0000405	dipeptidyl aminopeptidase B (fungus)
Akanth1|02911	MER0017244	At1g13610 ({Arabidopsis thaliana})
Akanth1|02939	MER0005329	aorsin
Akanth1|02941	MER0034665	SPAPB1A11.02 g.p. ({Schizosaccharomyces pombe})
Akanth1|03039	MER0002179	ubp5 ({Schizosaccharomyces pombe}-type)
Akanth1|03067	MER0010982	separase (yeast-type)
Akanth1|03105	MER0002477	glycosylphosphatidylinositol:protein transamidase
Akanth1|03111	MER0004893	DmpA aminopeptidase
Akanth1|03113	MER0000432	epoxide hydrolase
Akanth1|03124	MER0005813	T06A4.1 g.p. ({Caenorhabditis elegans})
Akanth1|03208	MER0005767	dihydro-orotase
Akanth1|03266	MER0030934	para-nitrobenzyl esterase ({Bacillus subtilis})
Akanth1|03313	MER0001629	gamma-glutamyltransferase 1 (mammalian-type)
Akanth1|03314	MER0002489	alkaline D-peptidase
Akanth1|03318	MER0002694	ubpA ({Dictyostelium discoideum})
Akanth1|03359	MER0000440	tripeptidyl-peptidase B
Akanth1|03376	MER0015691	At5g19740 ({Arabidopsis thaliana})-type peptidase
Akanth1|03386	MER0196504	At5g47310 g.p. ({Arabidopsis thaliana})
Akanth1|03470	MER0033198	cholinesterase
Akanth1|03627	MER0001321	aspergilloglutamic peptidase
Akanth1|03631	MER0026262	Pab87 peptidase
Akanth1|03643	MER0006006	kex1 g.p. ({Schizosaccharomyces pombe})
Akanth1|03650	MER0014642	ubp9 ({Schizosaccharomyces pombe}-type)
Akanth1|03683	MER0005436	ubp3 ({Schizosaccharomyces pombe}-type)
Akanth1|03693	MER0215799	F14J16.17 protein ({Arabidopsis thaliana})
Akanth1|03697	MER0001399	penicillolysin
Akanth1|03776	MER0003297	Nma111 peptidase
Akanth1|03798	MER0167712	microcystinase MlrC
Akanth1|03869	MER0078639	grifolisin
Akanth1|03881	MER0001399	penicillolysin
Akanth1|03902	MER0185433	DDB_G0275415 ({Dictyostelium discoideum})
Akanth1|03921	MER0001218	Ste23 peptidase
Akanth1|03951	MER0044357	homoserine acetyltransferase ({Saccharomyces cerevisiae})
Akanth1|03958	MER0000356	cerevisin
Akanth1|03973	MER0064643	proliferation-associated protein 2G4
Akanth1|03997	MER0004528	iRhom1
Akanth1|04007	MER0032370	GliJ g.p. ({Aspergillus fumigatus})
Akanth1|04067	MER0000432	epoxide hydrolase
Akanth1|04074	MER0001229	mitochondrial processing peptidase beta-subunit
Akanth1|04095	MER0045094	TRP3 protein
Akanth1|04151	MER0034539	AsnB protein
Akanth1|04155	MER0210990	At5g53050 or MhpC protein ({Arabidopsis thaliana})
Akanth1|04157	MER0033244	C14orf29 protein
Akanth1|04169	MER0000344	oryzin
Akanth1|04197	MER0001710	proteasome subunit beta 3
Akanth1|04276	MER0033274	hormone-sensitive lipase
Akanth1|04289	MER0002038	bacillus Xaa-Pro aminopeptidase
Akanth1|04304	MER0034665	SPAPB1A11.02 g.p. ({Schizosaccharomyces pombe})
Akanth1|04331	MER0005715	SPBC4F6.19c g.p. ({Schizosaccharomyces pombe})
Akanth1|04356	MER0002153	candidapepsin SAP1
Akanth1|04362	MER0001342	methionyl aminopeptidase 1 (eukaryote)
Akanth1|04366	MER0043475	gamma-glutamyl peptidase 1 ({Arabidopsis thaliana})
Akanth1|04374	MER0000440	tripeptidyl-peptidase B
Akanth1|04378	MER0026262	Pab87 peptidase
Akanth1|04456	MER0001229	mitochondrial processing peptidase beta-subunit
Akanth1|04464	MER0026262	Pab87 peptidase
Akanth1|04468	MER0033198	cholinesterase
Akanth1|04505	MER0014006	trichodermapepsin
Akanth1|04529	MER0064210	SENP8 peptidase (fungus-type)
Akanth1|04541	MER0014430	yeast presenilin fold 1
Akanth1|04607	MER0034959	F27c8.6 g.p. ({Caenorhabditis elegans})
Akanth1|04625	MER0015270	cym1 g.p. ({Schizosaccharomyces pombe})
Akanth1|04627	MER0002635	Ste24 peptidase
Akanth1|04628	MER0003909	insulysin homologue ({Saccharomyces cerevisiae})
Akanth1|04654	MER0034963	lact-5 g.p. ({Caenorhabditis elegans})
Akanth1|04670	MER0000934	candidapepsin SAP5
Akanth1|04677	MER0002605	m-AAA peptidase
Akanth1|04761	MER0093133	acid prolyl endopeptidase ({Aspergillus} sp.)
Akanth1|04774	MER0000496	PIM1 peptidase ({Saccharomyces}-type)
Akanth1|04784	MER0016549	carboxypeptidase OcpB
Akanth1|04801	MER0066227	tryptophanyl aminopeptidase 7-DMATS-type peptidase
Akanth1|04811	MER0000921	penicillopepsin
Akanth1|04870	MER0037714	guanine deaminase
Akanth1|04905	MER0033188	acetylcholinesterase
Akanth1|04909	MER0047634	Mername-AA240 putative peptidase ({Mus musculus})
Akanth1|04947	MER0000840	ubiquitinyl hydrolase UCH-D
Akanth1|05013	MER0003110	oligopeptidase MepB
Akanth1|05014	MER0003110	oligopeptidase MepB
Akanth1|05062	MER0002010	carboxypeptidase Y
Akanth1|05092	MER0026494	carnosine dipeptidase II
Akanth1|05121	MER0030146	STAMBP isopeptidase
Akanth1|05136	MER0000542	proteasome subunit beta2c
Akanth1|05165	MER0030081	putative v-snare binding protein ({Schizosaccharomyces pombe})
Akanth1|05168	MER0047611	Mername-AA242 peptidase homologue ({Mus musculus})
Akanth1|05198	MER0000553	proteasome subunit alpha 3
Akanth1|05231	MER0029056	otubain-1
Akanth1|05239	MER0351045	MER0351045
Akanth1|05271	MER0017177	cytosolic epoxide hydrolase
Akanth1|05279	MER0000865	Ubp2 ubiquitin peptidase
Akanth1|05330	MER0033198	cholinesterase
Akanth1|05332	MER0001269	Gly-Xaa carboxypeptidase
Akanth1|05348	MER0001884	ubiquitin-specific peptidase 8
Akanth1|05408	MER0957411	OTUD6B peptidase ({Homo sapiens})
Akanth1|05440	MER0002010	carboxypeptidase Y
Akanth1|05451	MER0000557	proteasome subunit alpha 6
Akanth1|05485	MER0031431	YDR533C putative peptidase
Akanth1|05553	MER0013494	Uch2 peptidase
Akanth1|05555	MER0080922	SA76 peptidase ({Trichoderma sp.})
Akanth1|05598	MER0018608	survivin
Akanth1|05598	MER0018608	survivin
Akanth1|05620	MER0017177	cytosolic epoxide hydrolase
Akanth1|05660	MER0093133	acid prolyl endopeptidase ({Aspergillus} sp.)
Akanth1|05688	MER0059846	YheT protein ({Escherichia coli})
Akanth1|05691	MER0064621	ubiquitin-specific endopeptidase 39 [misleading]
Akanth1|05747	MER0002281	leukotriene A4 hydrolase ({Saccharomyces cerevisiae})
Akanth1|05777	MER0034539	AsnB protein
Akanth1|05793	MER0015095	glutaminyl cyclase
Akanth1|05800	MER0026493	Tata binding protein associated factor
Akanth1|05849	MER0004893	DmpA aminopeptidase
Akanth1|05927	MER0016549	carboxypeptidase OcpB
Akanth1|05954	MER0032370	GliJ g.p. ({Aspergillus fumigatus})
Akanth1|05997	MER0017177	cytosolic epoxide hydrolase
Akanth1|06002	MER0000549	MER0000549
Akanth1|06039	MER0182135	PCADAM-type peptidase
Akanth1|06054	MER1054226	MINDY-1 protein
Akanth1|06081	MER0030133	eukaryotic translation initiation factor 3 subunit F
Akanth1|06115	MER0163432	orthocaspase MaOC1 ({Microcystis aeruginosa})
Akanth1|06128	MER0000263	dipeptidyl-peptidase 5
Akanth1|06134	MER0001728	methionyl aminopeptidase 2
Akanth1|06162	MER0000009	proteolytic lectin ({Anopheles}-type)
Akanth1|06197	MER0156574	myroilysin
Akanth1|06200	MER0026495	FACT complex subunit SPT16
Akanth1|06251	MER0026262	Pab87 peptidase
Akanth1|06273	MER0192051	HflK
Akanth1|06276	MER0115298	protealysin
Akanth1|06284	MER0127117	ATP23 peptidase ({Saccharomyces cerevisiae}-type)
Akanth1|06290	MER0000440	tripeptidyl-peptidase B
Akanth1|06309	MER0001879	putative ubiquitin carboxyl-terminal hydrolase ybr058c ({Saccharomyces cerevisiae})
Akanth1|06340	MER0026262	Pab87 peptidase
Akanth1|06355	MER0003105	FRA1 g.p. ({Saccharomyces cerevisiae})
Akanth1|06360	MER0000474	peptidase Clp (type 1)
Akanth1|06417	MER0017177	cytosolic epoxide hydrolase
Akanth1|06420	MER0066227	tryptophanyl aminopeptidase 7-DMATS-type peptidase
Akanth1|06425	MER0002676	proteasome subunit beta 2
Akanth1|06427	MER0011024	ulp2 protein ({Schizosaccharomyces pombe}-type)
Akanth1|06455	MER0034665	SPAPB1A11.02 g.p. ({Schizosaccharomyces pombe})
Akanth1|06502	MER0014418	HMRA peptidase ({Staphylococcus}-type)
Akanth1|06548	MER0011583	S9dr carboxypeptidase ({Deinococcus radiodurans})
Akanth1|06549	MER0017401	trilobed protease
Akanth1|06555	MER0017622	SPAC823.09c g.p. ({Schizosaccharomyces pombe})
Akanth1|06637	MER0030934	para-nitrobenzyl esterase ({Bacillus subtilis})
Akanth1|06655	MER0000554	proteasome subunit alpha 4
Akanth1|06664	MER0001516	proteasome subunit beta5c
Akanth1|06702	MER0030934	para-nitrobenzyl esterase ({Bacillus subtilis})
Akanth1|06771	MER0238460	BSn5_04310 g.p. ({Bacillus subtilis})
Akanth1|06785	MER0003037	podosporapepsin
Akanth1|06787	MER0000441	tripeptidyl-peptidase C
Akanth1|06789	MER0014672	RipB peptidoglycan hydrolase
Akanth1|06791	MER0004316	ubp6 ({Schizosaccharomyces pombe}-type)
Akanth1|06811	MER0000485	Lon-A peptidase
Akanth1|06824	MER0011785	Mername-AA086 putative peptidase
Akanth1|06860	MER0003037	podosporapepsin
Akanth1|06862	MER0001911	hypothetical 47 kDa protein ({Saccharomyces cerevisiae})
Akanth1|06865	MER0032443	leucine aminopeptidase-1 ({Aspergillus fumigatus})
Akanth1|06878	MER0001156	mitochondrial intermediate peptidase
Akanth1|06883	MER0036115	serhl ({Brachydanio rerio})
Akanth1|06950	MER0209266	lipase M
Akanth1|06963	MER0013463	aminopeptidase P3
Akanth1|07072	MER0001604	krp1 g.p. ({Schizosaccharomyces pombe})
Akanth1|07136	MER0215827	SPCC1442.07c g.p. ({Schizosaccharomyces pombe})
Akanth1|07173	MER0437468	ctps g.p. ({Brachydanio rerio})
Akanth1|07211	MER0002010	carboxypeptidase Y
Akanth1|07388	MER1143079	paenidase
Akanth1|07497	MER0026262	Pab87 peptidase
Akanth1|07500	MER0214730	T5L19.30 protein ({Arabidopsis thaliana})
Akanth1|07532	MER0000441	tripeptidyl-peptidase C
Akanth1|07539	MER0002659	indoleacetyl amino acid hydrolase
Akanth1|07550	MER0078701	carboxylesterase homologue ({Rattus norvegicus})
Akanth1|07569	MER0019759	At4g33090 g.p. ({Arabidopsis thaliana})
Akanth1|07583	MER0005855	ubiquitin carboxy-terminal hydrolase 16 ({Saccharomyces cerevisiae})
Akanth1|07594	MER0078639	grifolisin
Akanth1|07610	MER0030317	ubiquitin-specific peptidase 52 [misleading]
Akanth1|07651	MER0026262	Pab87 peptidase
Akanth1|07655	MER0036069	At4g10050 ({Arabidopsis thaliana})
Akanth1|07681	MER0042827	phosphoribosylformylglycinamidine synthase
Akanth1|07684	MER0000338	cuticle-degrading peptidase of parasitic fungus
Akanth1|07714	MER0000597	mitochondrial inner membrane peptidase 1
Akanth1|07748	MER0011122	metallopeptidase MEP1 ({Metarhizium}-type)
Akanth1|07758	MER0001269	Gly-Xaa carboxypeptidase
Akanth1|07878	MER0002010	carboxypeptidase Y
Akanth1|07889	MER0034745	2210023G05RIK protein
Akanth1|07910	MER0014418	HMRA peptidase ({Staphylococcus}-type)
Akanth1|07913	MER0003908	carboxypeptidase MeCPA
Akanth1|07973	MER0078639	grifolisin
Akanth1|08075	MER0026545	Oma1 peptidase
Akanth1|08151	MER0003541	cpy1 g.p. ({Schizosaccharomyces pombe})
Akanth1|08160	MER0001010	Aap1' aminopeptidase
Akanth1|08166	MER0209507	lysophospholipase II ({Homo sapiens})
Akanth1|08184	MER0215828	wss1 g.p. ({Schizosaccharomyces pombe})
Akanth1|08200	MER0001437	peptidase F
Akanth1|08204	MER0027244	fire ant chymotrypsin
Akanth1|08206	MER0003037	podosporapepsin
Akanth1|08207	MER0003110	oligopeptidase MepB
Akanth1|08347	MER0006204	esterase EstB
Akanth1|08352	MER0016363	2410072d24rik protein (mouse)
Akanth1|08415	MER1054487	ferredoxin-dependent glutamate synthase 1 (chloroplast, mitochondria)
Akanth1|08435	MER0122119	csn5 g.p. ({Dictyostelium discoideum})
Akanth1|08440	MER0066916	imidazoleglycerol-phosphate synthase ({Pyrococcus furiosus})
Akanth1|08567	MER0000941	saccharopepsin
Akanth1|08583	MER0090759	PepAc peptidase
Akanth1|08607	MER0016549	carboxypeptidase OcpB
Akanth1|08610	MER0016549	carboxypeptidase OcpB
Akanth1|08677	MER0003110	oligopeptidase MepB
Akanth1|08723	MER0015303	At5g04710 ({Arabidopsis thaliana})
Akanth1|08769	MER0026262	Pab87 peptidase
Akanth1|08775	MER0034539	AsnB protein
