# Supplementary material for: Masters of the Manipulator? A Comparative Genomics Study of Niveomyces gen. nov. and Two New Species of Mycoparasites Associated with Ophiocordyceps Camponoti-Floridani
Source: Research Square preprint supplement (doi:10.21203/rs.3.rs-449898/v1), 2021-04-28
Supplement: Supplementary file 2 [file ea8b88b3866d953c94ffcb87.xlsx]

## Sheet: Sheet1
Property	Polycephalomyces oviedoensis	Niveomyces ophiocordycipitis
Sequences in assembly	1725	1357
Total assembly length (Mbp)	27.11	31.95
Assembly GC content (%)	51.49	51.11
Assembly gaps (%)	0	0
L50 number (#)	189	200
N50 length (bp)	41529	49324
Genes	8422	8930
Gene length (median)	1382	1452
Transcript length (median)	1233	1302
Exon length (median)	294	323
CDS length (median)	1230	1299
Protein length (median)	410	433
Spliced genes (total, %)	6294 (74.73%)	6450 (72.23%)
Exons per gene (median)	2	2
Intron length (median)	64	67
Introns per spliced gene (median)	2	2
Gene density (genes / Mbp)	310.68	279.49
Coding content of assembly (bp, %)	12740001 (47.0%)	13987488 (43.78%)
Proteins with internal stops (total, %)	0 (0.0%)	0 (0.0%)
Unique PFAM domains	3803	3786
Genes with PFAM (total, %)	5985 (71.06%)	6433 (72.04%)
Genes with GO (total, %)	3812 (45.26%)	4159 (46.57%)
Genes with signalP (total, %)	675 (8.01%)	766 (8.58%)
Genes with TMHMM (total, %)	1496 (17.76%)	1714 (19.19%)
Genes annotated as TF (total, %)	242 (2.87%)	304 (3.4%)
Genes annotated as MEROPS protease (total, %)	266 (3.16%)	319 (3.57%)
Genes annotated as CAZyme (total, %)	224 (2.66%)	296 (3.31%)
Secondary metabolite clusters	32	38
CEGMA completeness (%)	98.03	97.16
BUSCO2 completeness (fungi_odb9)	Complete: 94.48% (Single-copy: 93.79%, Duplicated: 0.69%), Fragmented: 3.79%, Missing: 1.72%	Complete: 93.1% (Single-copy: 92.07%, Duplicated: 1.03%), Fragmented: 2.41%, Missing: 4.48%
